# Supplementary material
Source: HighWire-hosted journal article supplement (http://hw-f5-jim.highwire.org/highwire/filestream/139661/field_highwire_adjunct_files/0/AFMR_Meeting_Calendar_2021_69_8.pdf)
Supplement: AFMR_Meeting_Calendar_2021_69_8.pdf [file AFMR_Meeting_Calendar_2021_69_8.pdf]

# Western Medical Research Conference

January 20-22, 2022

# Carmel

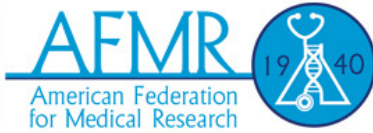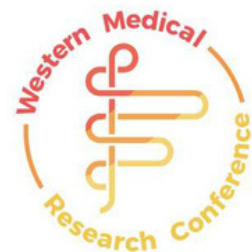

# Southern Regional Meeting

February 10-12, 2022

# New Orleans

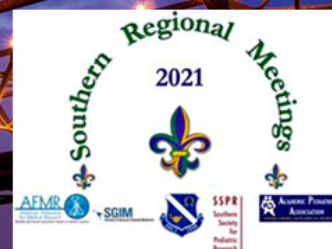

# Midwest Clinical and Translational Research Meeting

March 3-4, 2022 • Chicago, IL  
Fairmont Chicago Millennium Park

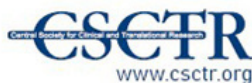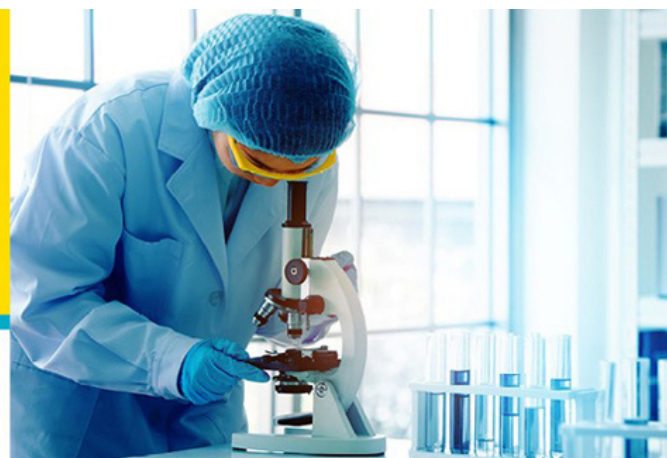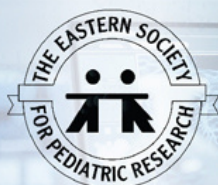

easternspr.org

**1<sup>ST</sup> ANNUAL**  
EASTERN MEDICAL RESEARCH CONFERENCE  
**MARCH 10-12, 2022**

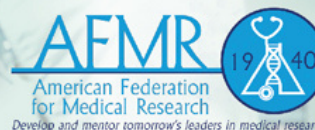

afmr.org
